# Supplementary material for: Time-course analysis of cardiac and serum galectin-3 in viral myocarditis after an encephalomyocarditis virus inoculation
Source: PubMed Central journal article supplement (PMC6343901; doi:10.1371/journal.pone.0210971), 2019-01-23
Supplement: pone.0210971.s001.pdf [file pone.0210971.s001.pdf]

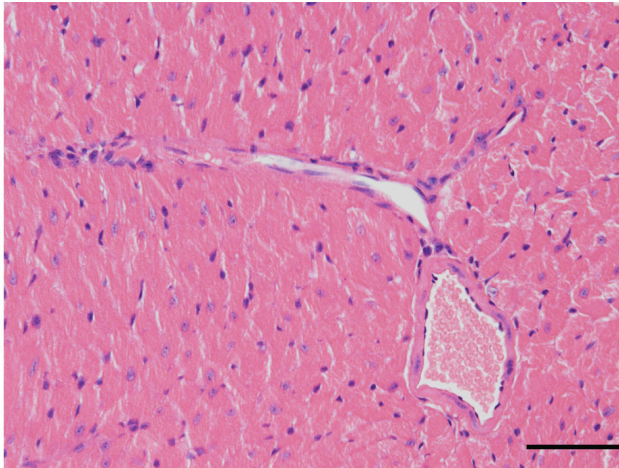

Grade 0 (none)

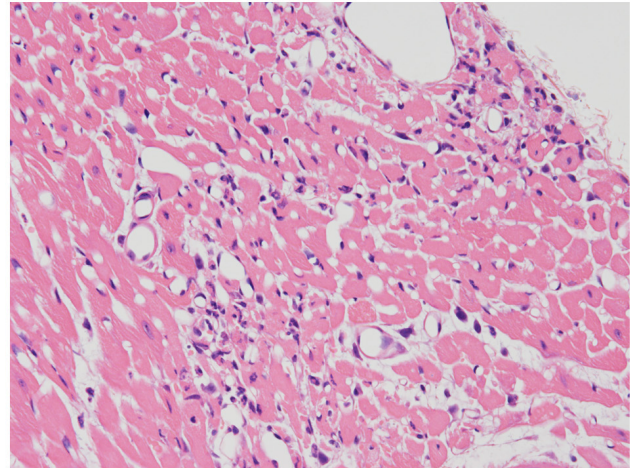

Grade 1 (mild)

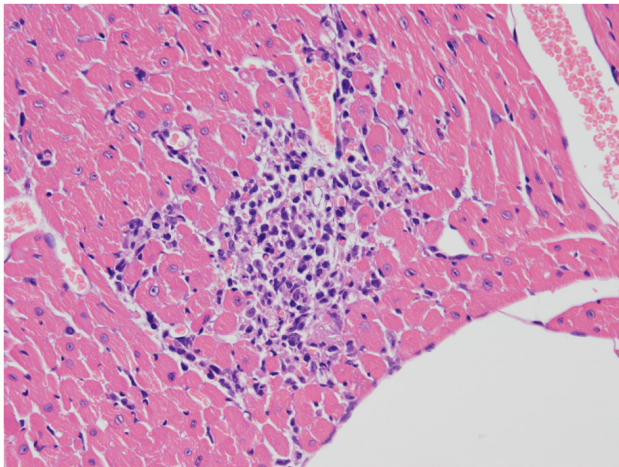

Grade 2 (moderate)

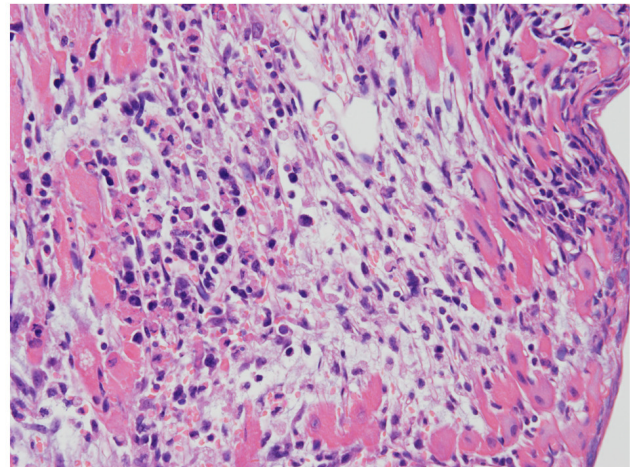

Grade 3 (severe)

Figure S1. The evaluation of inflammatory response was graded as 0= none, 1= mild, 2= moderate, and 3= severe as shown in the picture. Scale bar = 50  $\mu$ m.
